# Supplementary material for: Mass transfer driven pore engineering of activated carbon from the activation of biomass
Source: Royal Society of Chemistry journal article supplement (doi:10.1039/d5gc05946a), 2026-01-01
Supplement: d5gc05946a1.pdf [file d5gc05946a1.pdf]

**Mass Transfer Driven Pore Engineering of Activated Carbon from Activation of  
Biomass**

Weilong Wu, Yi Wang\*, Xun Hu\*

State Key Laboratory of Coal Combustion, Huazhong University of Science and Technology, Wu  
Han, 430074, P.R. China

**\*Corresponding authors:**

Prof. Xun Hu; E-mail: [xun.hu@outlook.com](mailto:xun.hu@outlook.com)

Phone: +86 531 8973 6201; Fax: +86 531 8973 6201

Prof. Yi Wang; E-mail: [alenwang@hust.edu.cn](mailto:alenwang@hust.edu.cn)

**Invited review**

**Submitted to**

**Green Chemistry**

**For consideration for publication**

## Supplementary Information

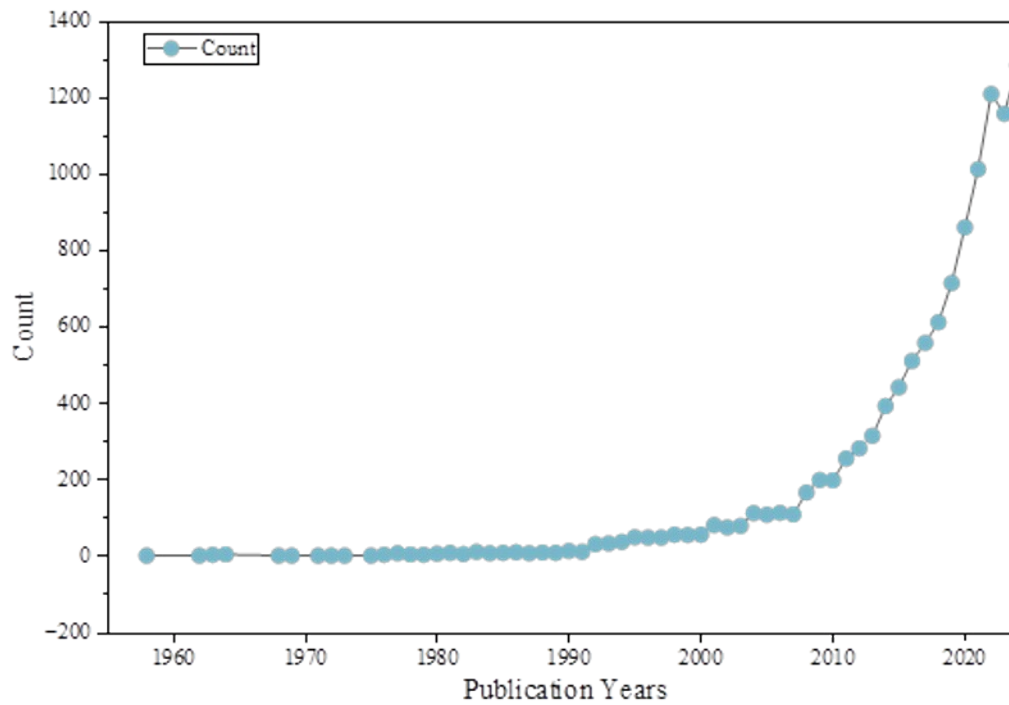

Figure S1. Research trends of biomass active AC.

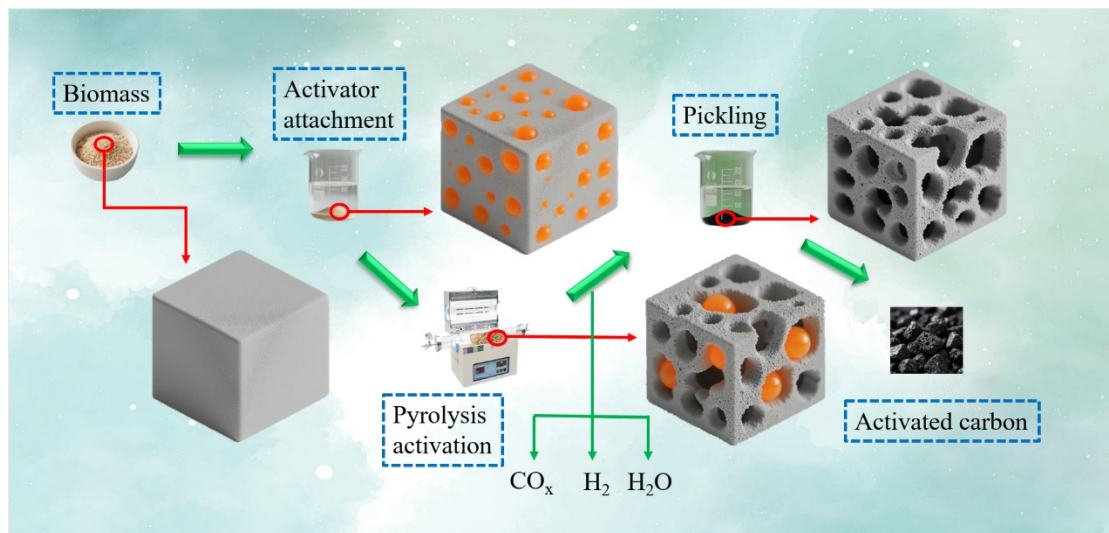

Figure S2. General process and principle of chemical activation.

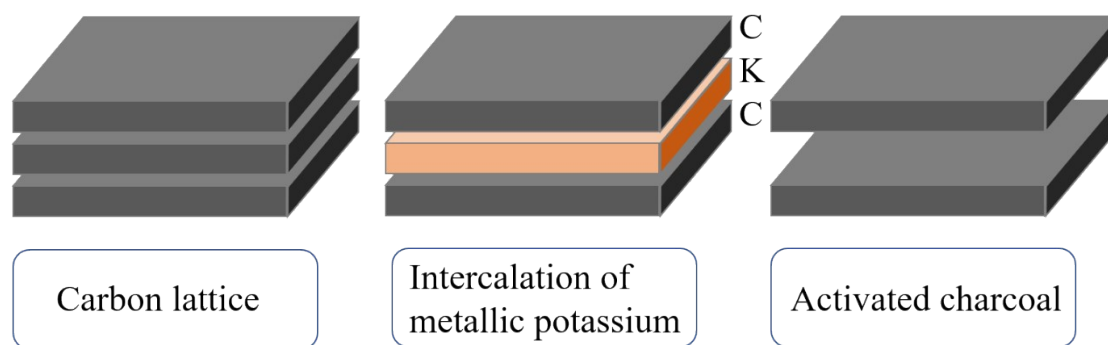

Figure S3. Interlayer effect of metal K.

Table S1. Explanation of pore related terms

| Term                  | Object and Definition                                                                                            |
|-----------------------|------------------------------------------------------------------------------------------------------------------|
| Pore                  | Refers to the space or cavity within which substances are stored, emphasizing its static and spatial properties. |
| Pore throat           | A narrow channel connecting two cavities. This is the most critical limiting part in the pore network.           |
| Channel               | Connected channels. Emphasize its function as a material transport 'path'.                                       |
| Mass transfer pathway | Include pathways for transmission through various means such as pores, grain boundaries, and surface diffusion.  |
| Network               | The overall topology structure composed of interconnected cavities and throats.                                  |

Table S2. Directional control of activated carbon for gas adsorption

| Target gas      | Core requirements                                        | Key regulatory strategies                                                                                                                             |
|-----------------|----------------------------------------------------------|-------------------------------------------------------------------------------------------------------------------------------------------------------|
| CO <sub>2</sub> | Micropore matching+basic sites                           | KOH activation+nitrogen doping; temperature 500-600°C; microwave heating to reduce diffusion resistance                                               |
| VOCs            | Mesoporous channels+hydrophobic/ $\pi$ interaction sites | Phosphoric acid activation (mesoporous); raw material pre-ashing; low-temperature carbon retention with alkyl chain or pyridine nitrogen modification |

Table S3. Working principle of supercapacitor

| Mechanism                | Principle                                                                                               | Characteristic                                                               | Contribution |
|--------------------------|---------------------------------------------------------------------------------------------------------|------------------------------------------------------------------------------|--------------|
| Double-layer capacitance | Electrolyte ions electrostatically adsorb onto activated carbon pores, forming an electric double layer | Physical process, fast response and long cycle life                          | Primary      |
| Pseudocapacitance        | Surface functional groups on activated carbon enable rapid, reversible pseudocapacitive reactions       | Chemical process, provides higher specific capacity but compromise stability | Secondary    |
